# Supplementary material for: Electrospun gelatin nanofibers loaded with vitamins A and E as antibacterial wound dressing materials
Source: Royal Society of Chemistry journal article supplement (doi:10.1039/c6ra05092a), 2016-01-01
Supplement: c6ra05092a1.pdf [file c6ra05092a1.pdf]

## Electrospun gelatin nanofibers loaded with vitamins A and E as antibacterial wound dressing materials

Heyu Li<sup>a</sup>, Maochun Wang<sup>a</sup>, Gareth R. Williams<sup>b</sup>, Junzi Wu<sup>a</sup>, Xiaozhu Sun<sup>a</sup>, Yao Lv<sup>a</sup> and Li-Min Zhu<sup>\*a</sup>

<sup>a</sup> College of Chemistry, Chemical Engineering and Biotechnology, Donghua University, Shanghai, 201620, China. E-mail: lzhu@dhu.edu.cn; Tel: 00862167792655

<sup>b</sup> UCL School of Pharmacy, University College London, 29-39 Brunswick Square, London, WC1N 1AX, UK.

### Supporting Information

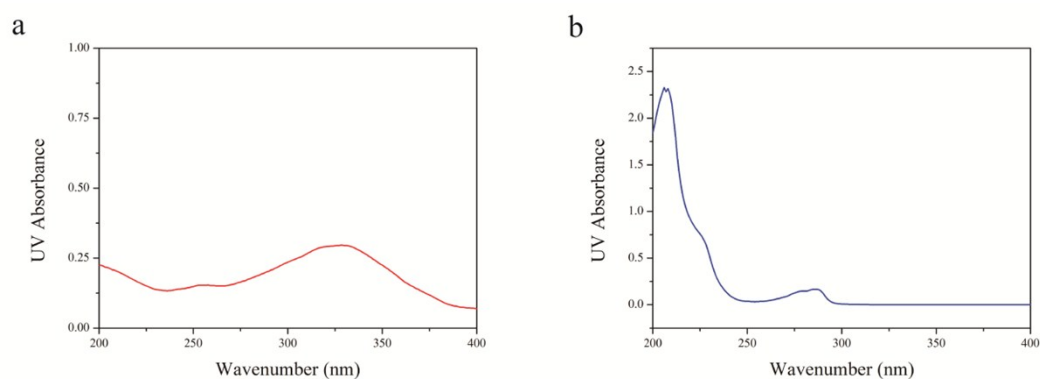

**Figure S1.** UV spectra of (a) vitamin A palmitate and (b) vitamin E TPGS in pH 7.4 phosphate buffer with 0.5 % (v/v) Tween 80.

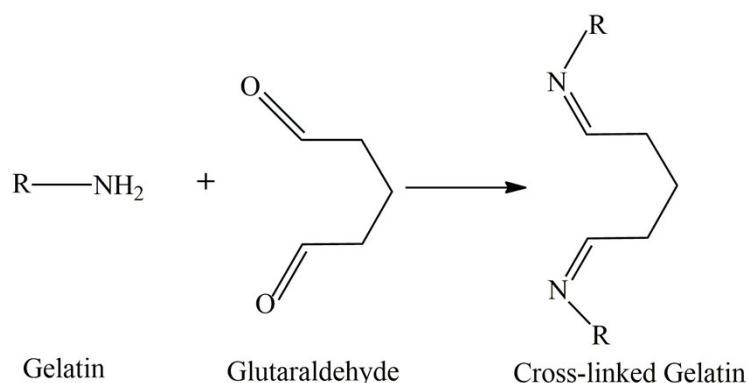

**Figure S2.** A schematic of the crosslinking process performed using glutaraldehyde

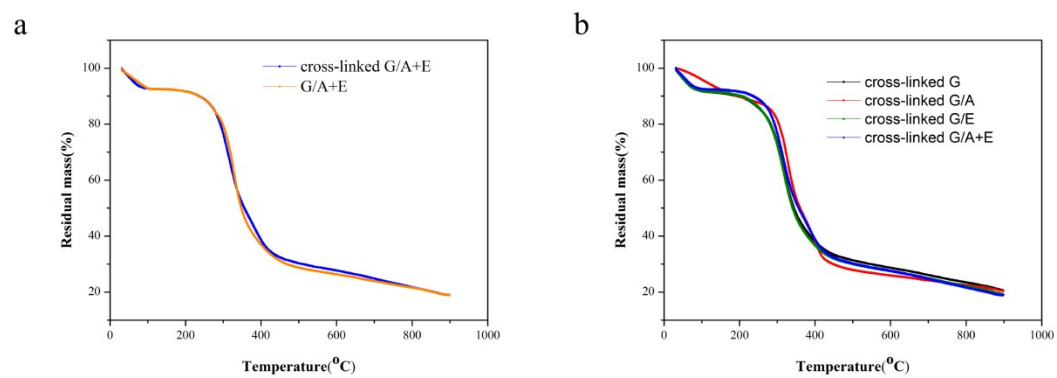

**Figure S3.** TGA traces of a) G/A+E fibers before and after cross-linking; b) all the cross-linked fibers.
